# Supplementary material
Source: PubMed Central journal article supplement (PMC454382)
Supplement: pnas_101_27_10024__3.pdf [file pnas_101_27_10024__3.pdf]

# *mfold*

# *mfold* + covariation data

template

template

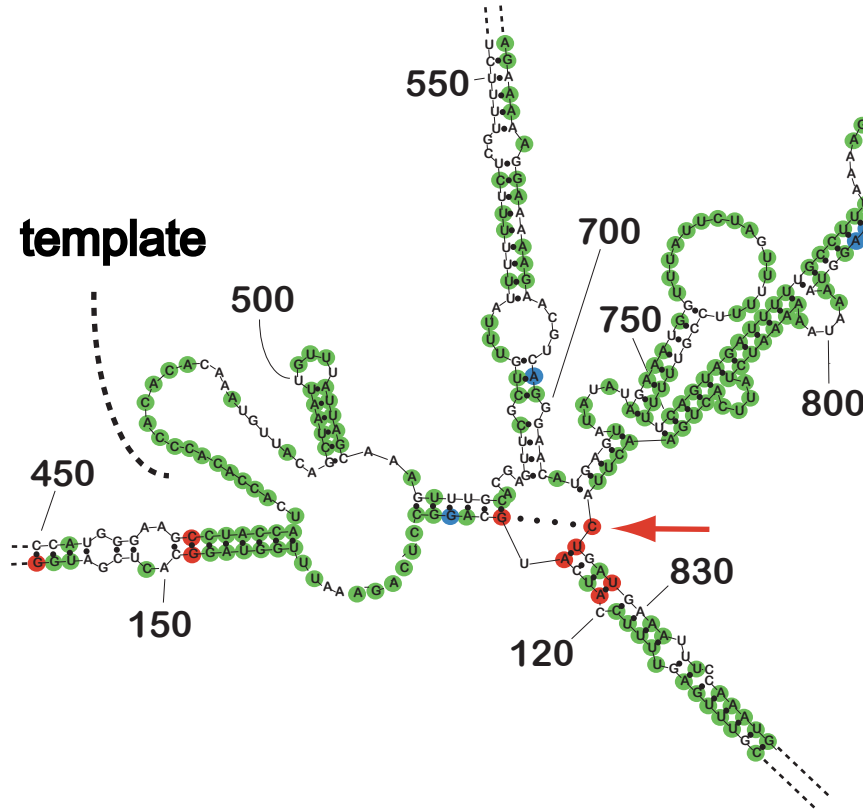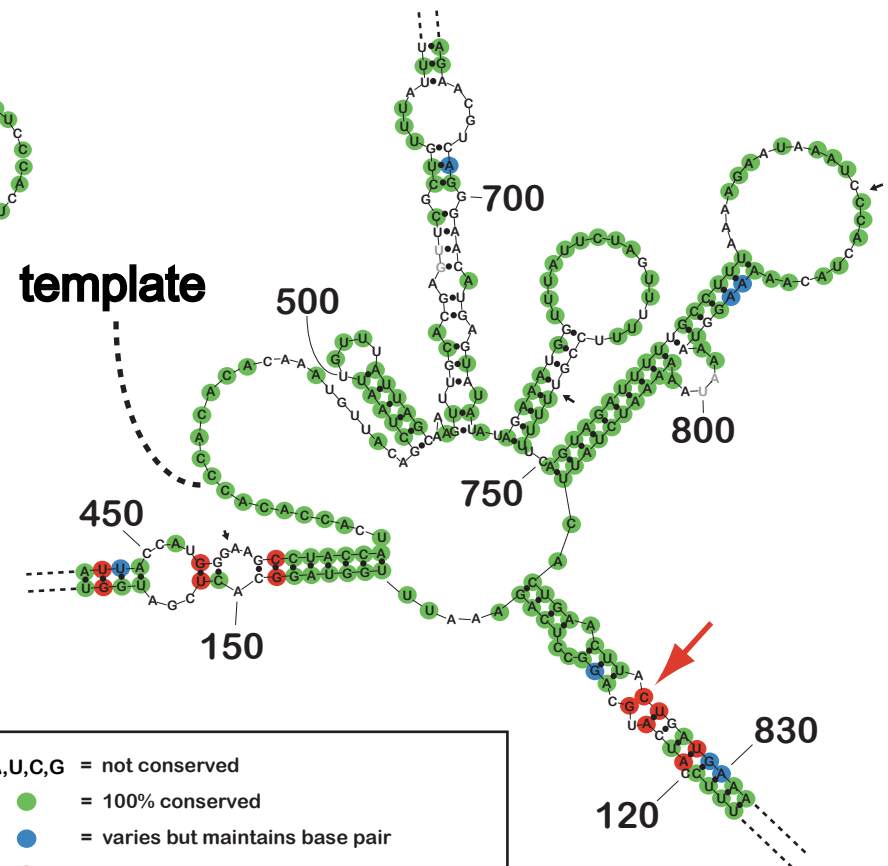

- A,U,C,G = not conserved
- = 100% conserved
- = varies but maintains base pair
- = covaries
- A,U,C,G = deleted in *S.p.*, *S.m.*, and/or *S.b.*
- ↓ = insertion of >1 nt in *S.p.*, *S.m.* and/or *S.b.*
